# Supplementary material
Source: Springer Nature journal article supplement (https://www.springermedizin.de/resource/supplementary/13569_2013_53_MOESM1_ESM.pdf/9676752)

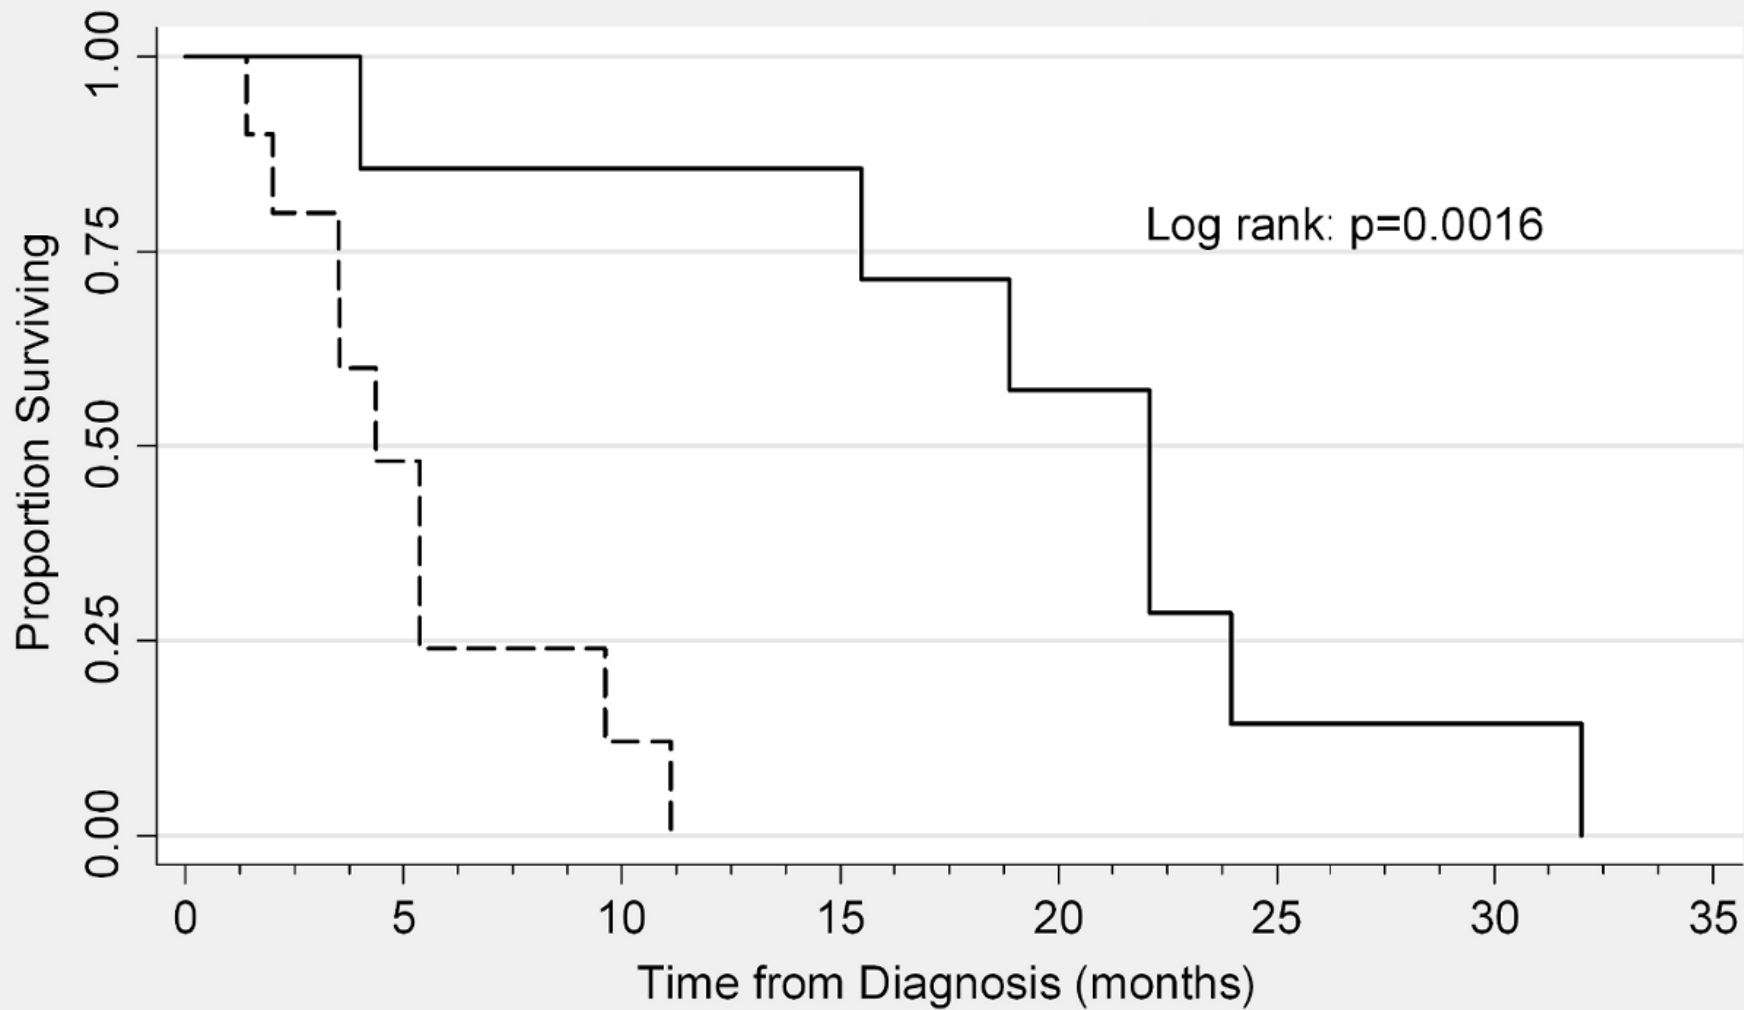

Supplement: MOESM1 [file 9676752]
